# Supplementary material for: Carbon nanostructures supported on Co/serpentinite for sulfentrazone removal
Source: Frontiers journal article supplement (doi:10.3389/frcrb.2024.1402105), 2024-05-21
Supplement: Data_Sheet_1.docx [file Data_Sheet_1.docx]

# Supplementary Figures


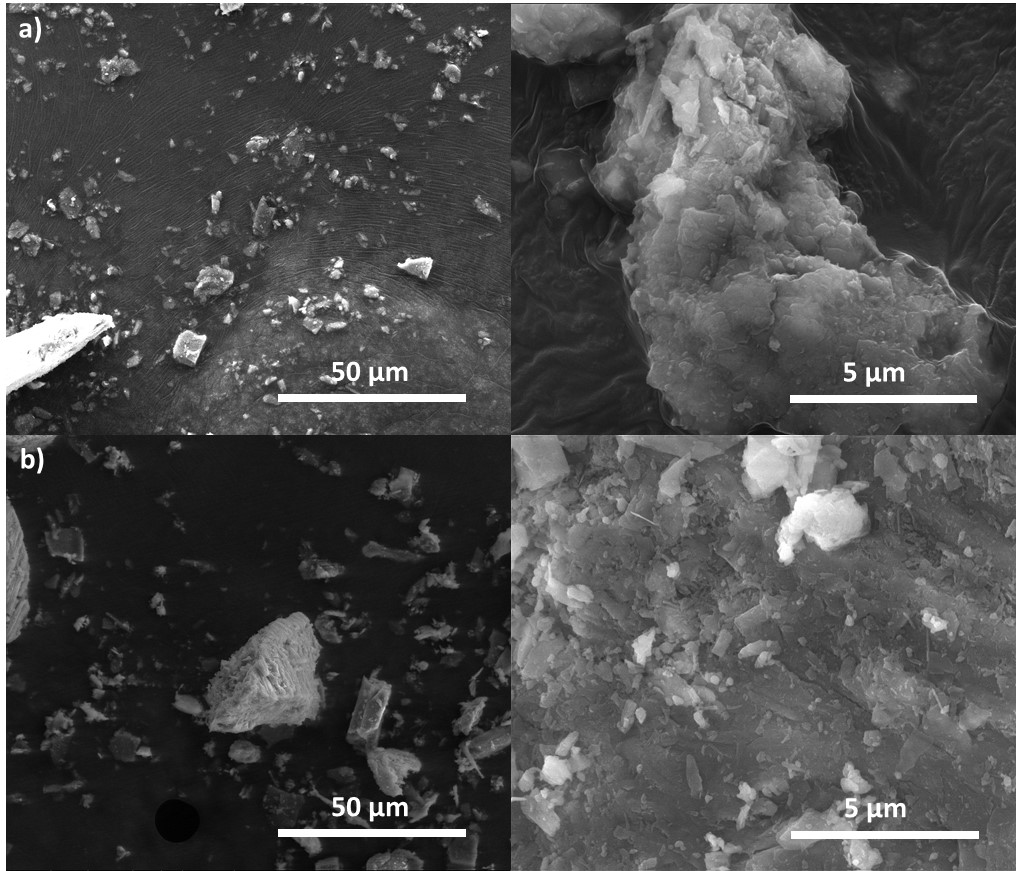


**Fig. S1.** SEM images of serpentinite, a) before and b) after, thermal treatment, in H2/N2 atmosphere at 800oC for one hour.


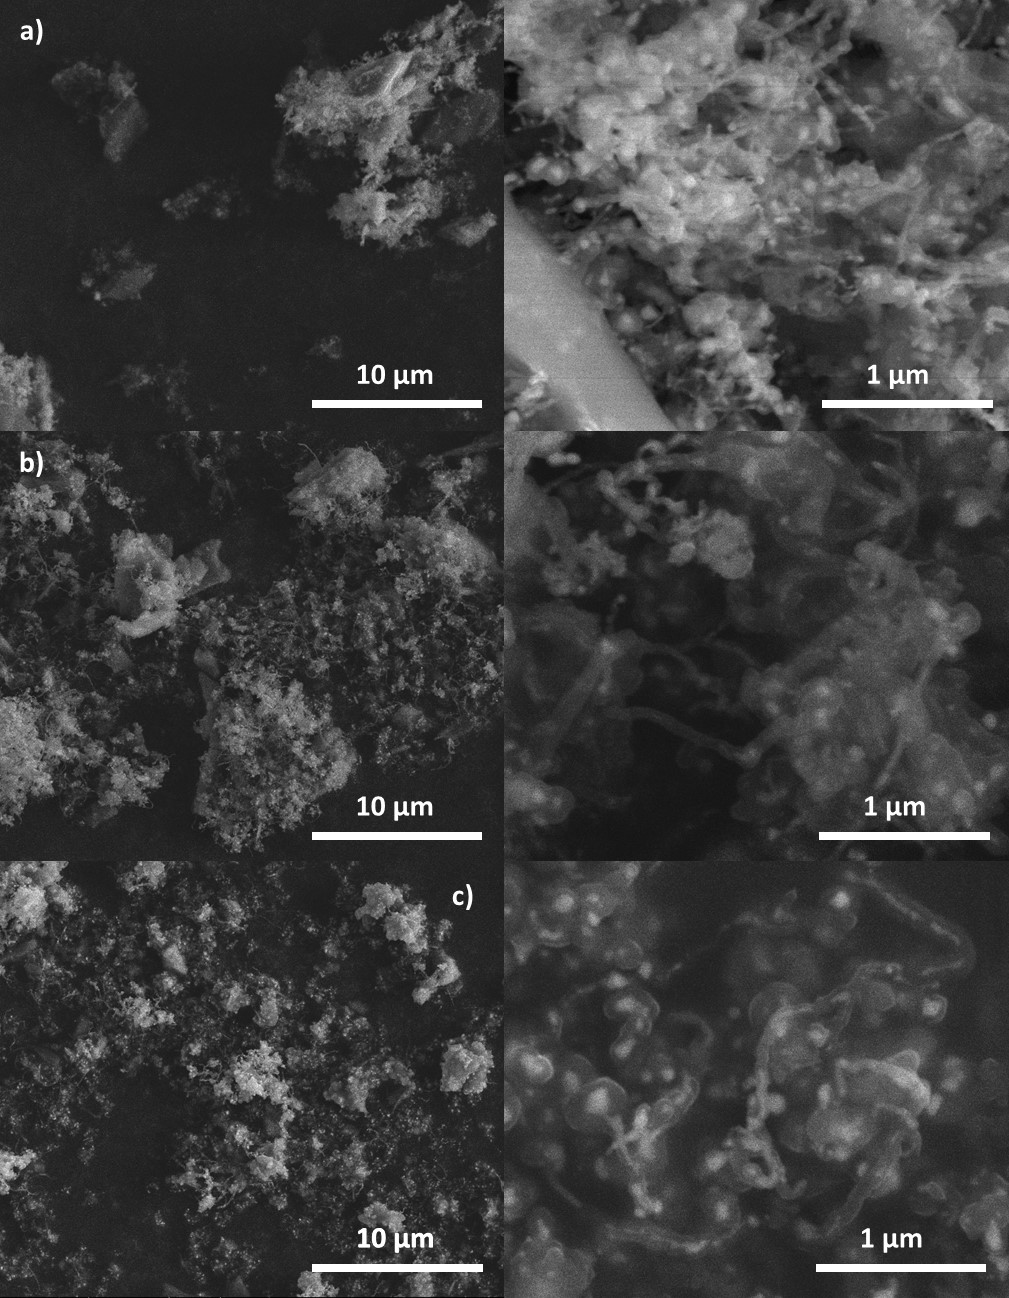


**Fig. S2.** SEM images of of serpentinite with 5 (a), 10 (b) and 20 (c) %wt of Co, after CVD process (methane 1 h).


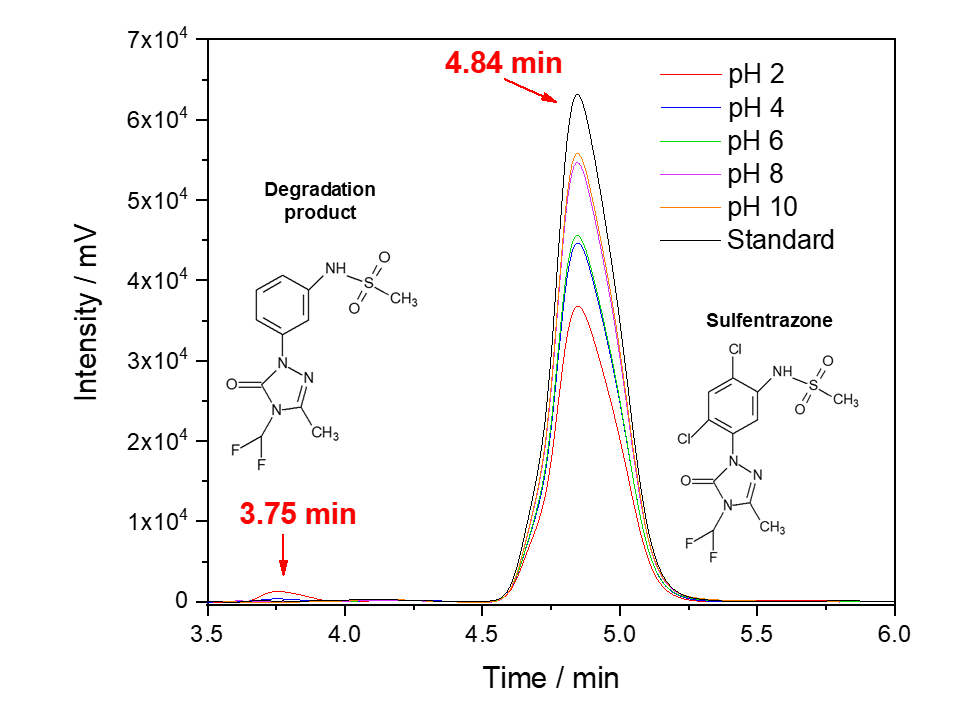


**Fig. S3.** Chromatograms obtained for reactions at different pH values. Retention time for the sulfentrazone = 4.84 min; retention time for the degradation product = 3.75.1

1. Nascimento, M. A.; Lopes, R. P.; Cruz, J. C.; Silva, A. A.; Lima, C. F., Sulfentrazone dechlorination by iron-nickel bimetallic nanoparticles. *Environ. Pollut.* **2016,** *211*, 406-413.
